# Supplementary material for: Anion order in perovskite oxynitrides AMO2N (A = Ba, Sr, Ca; M = Ta, Nb): a first-principles based investigation
Source: Royal Society of Chemistry journal article supplement (doi:10.1039/d0ra03681a), 2020-01-01
Supplement: d0ra03681a1.pdf [file d0ra03681a1.pdf]

## Supplementary information

### Anion order in perovskite oxynitrides $AMO_2N$ ( $A = Ba, Sr, Ca$ ; $M = Ta, Nb$ ): a first-principles based investigation

Xi Xu and Hong Jiang\*

Beijing National Laboratory for Molecular Sciences, College of Chemistry and  
Molecular Engineering, Peking University, 100871 Beijing, China.

E-mail: [jianghchem@pku.edu.cn](mailto:jianghchem@pku.edu.cn)

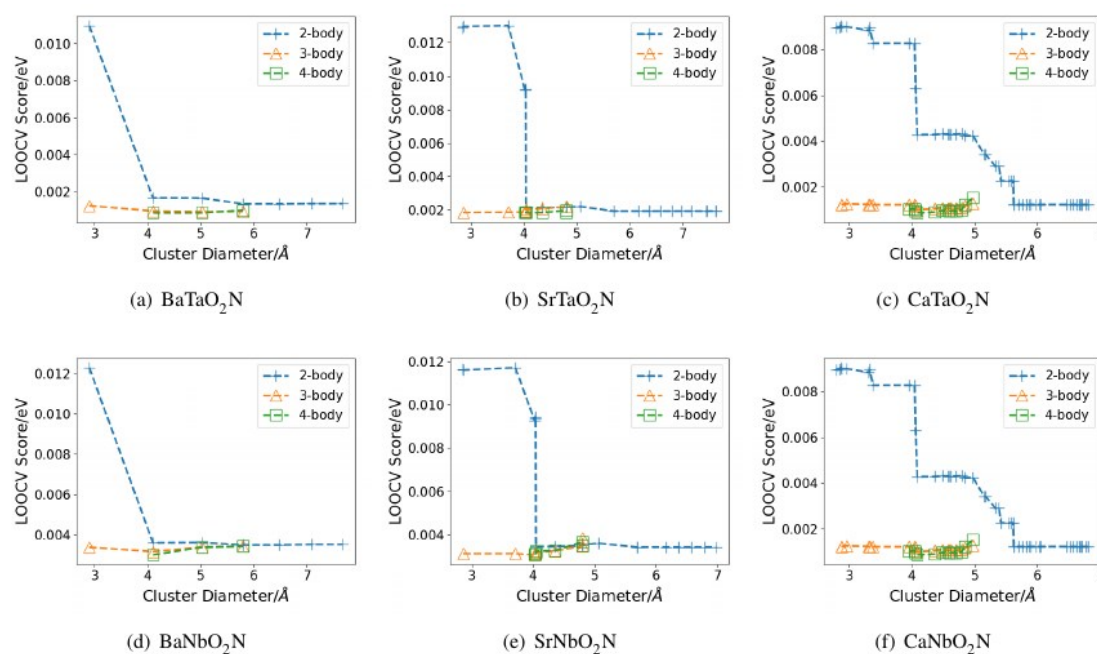

**Figure S1:** The leave-one-out cross-validation (LOOCV) scores with respect to different cluster expansion models of perovskite oxynitrides.

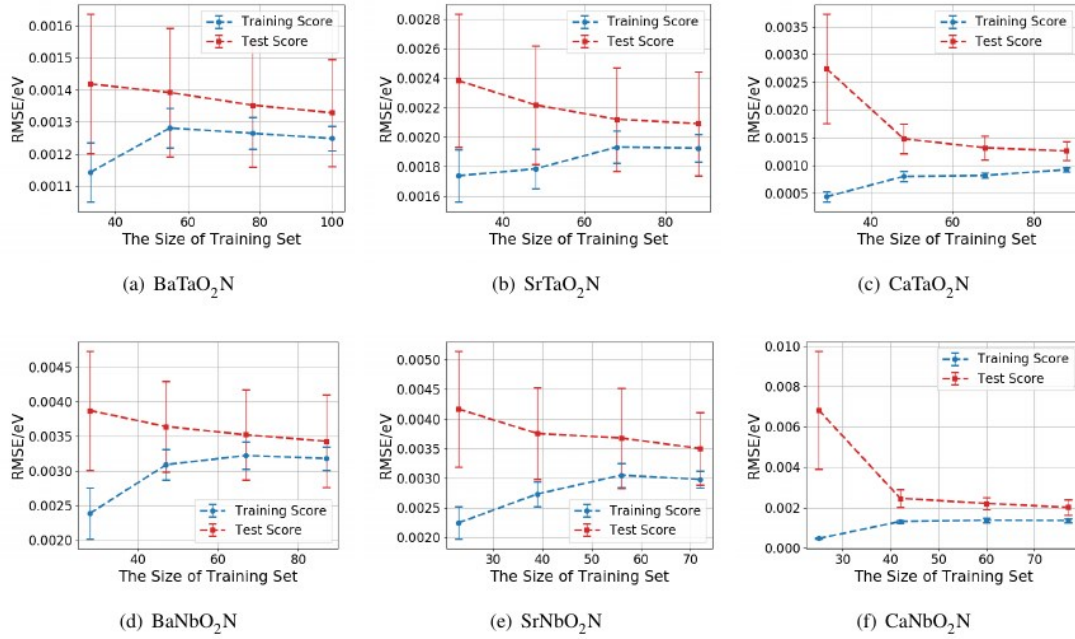

**Figure S2:** Learning curves for the optimal cluster expansion models with least-squares fitting of ECIs.

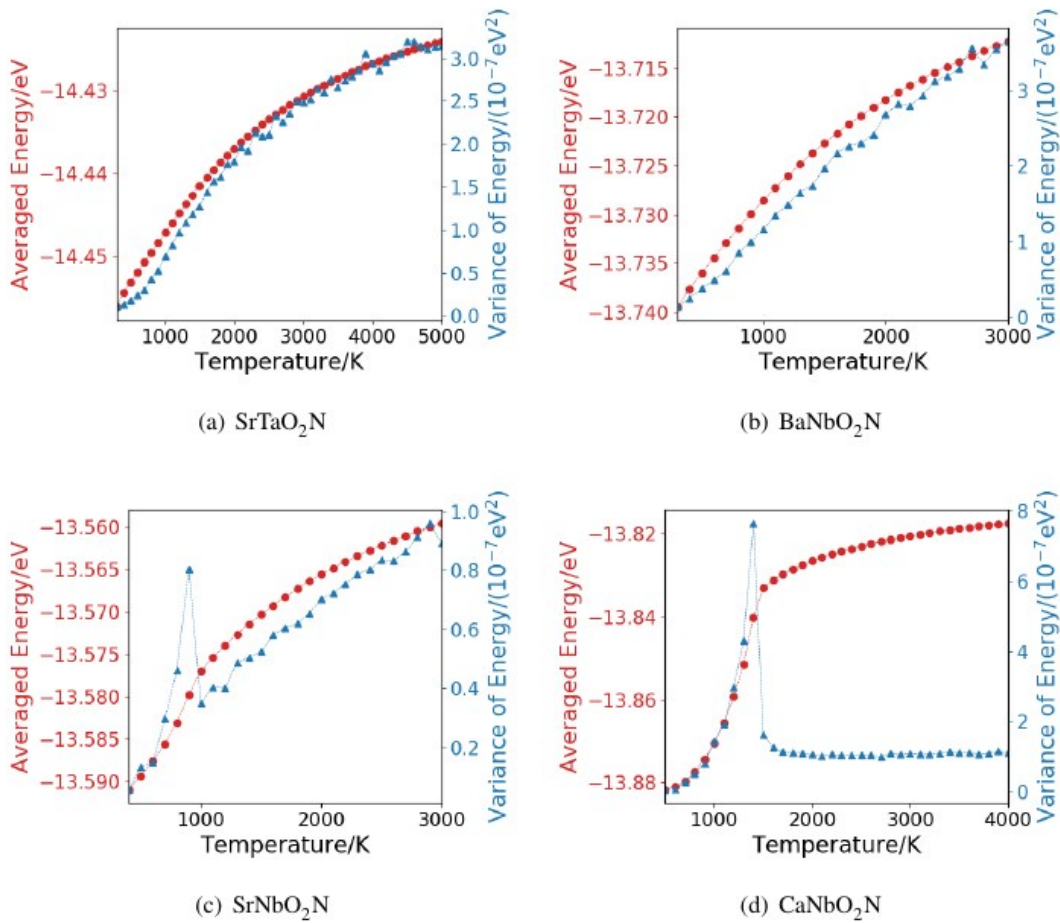

**Figure S3:** Statistically averaged energies and variance of Monte Carlo simulations for

SrTaO<sub>2</sub>N, BaNbO<sub>2</sub>N, SrNbO<sub>2</sub>N and CaNbO<sub>2</sub>N respectively.

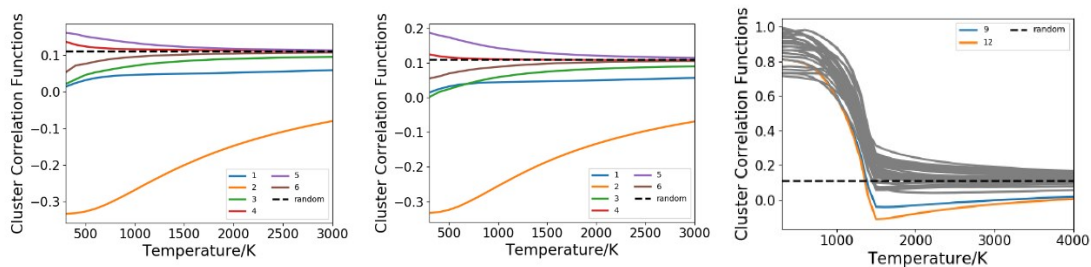

(a). BaTaO<sub>2</sub>N

(b) BaNbO<sub>2</sub>N

(c) CaNbO<sub>2</sub>N

**Figure S4:** Cluster correlation functions (CCFs) in BaTaO<sub>2</sub>N, BaNbO<sub>2</sub>N and CaNbO<sub>2</sub>N calculated by Monte Carlo simulations.

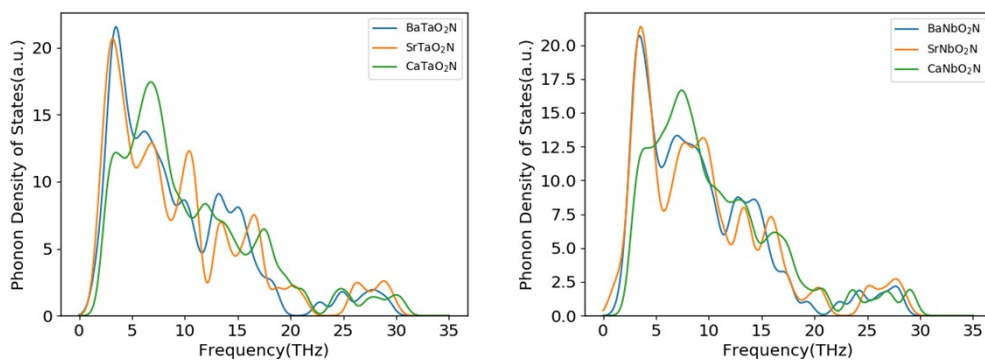

**Figure S5:** Phonon density of states for the SQoSs of AMO<sub>2</sub>N (A = Ba, Sr, Ca; M = Ta, Nb).
